# Supplementary material
Source: PubMed Central journal article supplement (PMC7965410)
Supplement: 3581_materials.pdf [file 3581_materials.pdf]

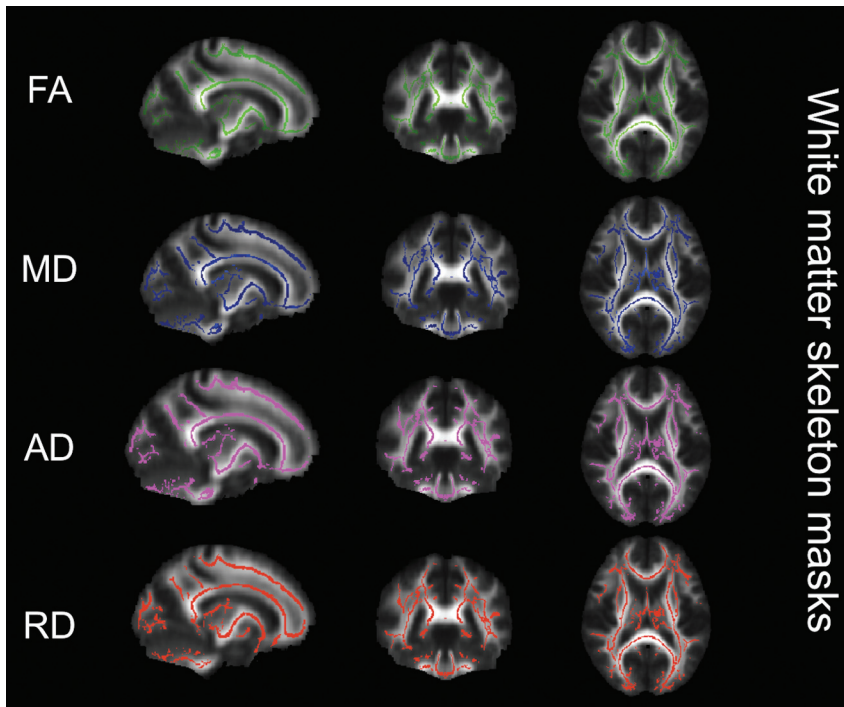

**ON-LINE FIG 1.** White matter skeleton masks. Mean skeleton masks for FA, mean, axial, and radial diffusivity overlaid on the Montreal Neurological Institute 151.1-mm standard image, representing the white matter tract geometry and fiber bundle centers.

**On-line Table 1: Clinical and MRI findings of patients and controls**

|                                              | Patients    | Controls   |
|----------------------------------------------|-------------|------------|
| Age (yr)                                     | 15.07 ± 1.6 | 14.7 ± 1.7 |
| Sex (M/F)                                    | 3/11        | 3/11       |
| Disease duration (mean) (yr)                 | 1.72 ± 0.89 | NA         |
| Disease duration (median) (yr)               | 1.37        | NA         |
| EDSS (mean)                                  | 0.75 ± 1.2  | NA         |
| No. of patients with EDSS = 0                | 9/14        | 14/14      |
| Lesion-load supratentorial mean              | 3.25 ± 0.96 | NA         |
| Lesion-load infratentorial mean              | 2.5 ± 0.76  | NA         |
| No. of patients with periventricular lesions | 11/14       | NA         |
| No. of patients with subcortical lesions     | 8/14        | NA         |
| No. of patients with brain stem lesions      | 7/14        | NA         |
| No. of patients with cerebellar lesions      | 10/14       | NA         |

**Note:**—EDSS indicate Expanded Disability Status Scale; NA, not applicable.

**On-line Table 2: Diffusion parameters in TBSS analysis<sup>a</sup>**

| Cluster No.           | Region                                                                                         | Diffusion Parameters |               |             |     |     |
|-----------------------|------------------------------------------------------------------------------------------------|----------------------|---------------|-------------|-----|-----|
|                       |                                                                                                | Max. P Value         | No. of Voxels | Coordinates |     |     |
|                       |                                                                                                |                      |               | X           | Y   | Z   |
| <b>FA<sup>b</sup></b> |                                                                                                |                      |               |             |     |     |
| 1                     | R/L splenium of corp. callosum, R/L body of corp. callosum                                     | .0004                | 1370          | 2           | -36 | 18  |
| 2                     | R posterior thalamic radiation                                                                 | .0006                | 780           | 36          | -57 | 7   |
| 3                     | L posterior corona radiata                                                                     | .0006                | 434           | -27         | -53 | 24  |
| 4                     | R posterior corona radiata                                                                     | .0008                | 282           | -26         | -48 | 30  |
| 5                     | L cingulate gyrus                                                                              | .001                 | 211           | -10         | -28 | 35  |
| 6                     | R inferior longitudinal fasciculus, inferior fronto-occipital fasciculus                       | .0006                | 175           | 41          | -20 | -8  |
| 7                     | R posterior thalamic radiation                                                                 | .001                 | 102           | 25          | -77 | 14  |
| <b>MD<sup>c</sup></b> |                                                                                                |                      |               |             |     |     |
| 1                     | L/R superior corona radiata, L/R anterior corona radiata, L/R superior longitudinal fasciculus | .0002                | 34807         | -29         | -18 | 39  |
| 2                     | L/R body of corp. callosum                                                                     | .0004                | 332           | -3          | -20 | 22  |
| 3                     | Fornix                                                                                         | .0006                | 329           | 4           | -17 | 21  |
| 4                     | L superior corona radiata/superior fronto-occipital fasciculus                                 | .0002                | 226           | -28         | 1   | 20  |
| 5                     | R corticospinal tract                                                                          | .0004                | 160           | 8           | -30 | 69  |
| 6                     | L forceps major                                                                                | .0004                | 116           | -19         | -81 | 28  |
| 7                     | L superior corona radiata                                                                      | .0004                | 100           | -19         | 14  | 36  |
| 8                     | L uncinate fasciculus                                                                          | .0006                | 88            | -36         | -7  | -15 |
| <b>AD<sup>c</sup></b> |                                                                                                |                      |               |             |     |     |
| 1                     | L anterior corona radiata                                                                      | .003                 | 1825          | -23         | 27  | 24  |
|                       | L corticospinal tract                                                                          | .002                 | 1300          | -17         | -24 | 54  |
| 3                     | R superior longitudinal fasciculus                                                             | .002                 | 1215          | 30          | -47 | 30  |
| 4                     | L superior longitudinal fasciculus                                                             | .003                 | 812           | -31         | -28 | 37  |
| 5                     | R superior corona radiata                                                                      | .003                 | 744           | 24          | 5   | 35  |
| 6                     | L posterior corona radiata                                                                     | .002                 | 742           | -27         | -33 | 29  |
| 7                     | R superior longitudinal fasciculus                                                             | .004                 | 479           | 34          | -11 | 52  |
| 8                     | L superior longitudinal fasciculus                                                             | .005                 | 290           | -25         | -51 | 31  |
| <b>RD<sup>c</sup></b> |                                                                                                |                      |               |             |     |     |
| 1                     | L/R superior corona radiata, L/R anterior corona radiata, L/R superior longitudinal fasciculus | .0002                | 31149         | 19          | -1  | 37  |
| 2                     | R anterior corona radiata                                                                      | .0004                | 1248          | 24          | 23  | 22  |
| 3                     | L/R body of corp. callosum, L/R splenium corp. callosum                                        | .0004                | 350           | -11         | -40 | 22  |
| 4                     | L/R anterior thalamic radiation                                                                | .0008                | 292           | 4           | -17 | 21  |
| 5                     | L corticospinal tract                                                                          | .0008                | 265           | -13         | -25 | 67  |
| 6                     | L inferior longitudinal fasciculus, L inferior fronto-occipital fasciculus                     | .0002                | 174           | -42         | -24 | -12 |
| 7                     | R superior corona radiata, R external capsule                                                  | .0002                | 166           | 29          | -1  | 19  |
| 8                     | L superior corona radiata, L external capsule                                                  | .0002                | 166           | -28         | 1   | 19  |

**Note:**—R indicates right; L, left; Max., maximum; corp., corpus.

<sup>a</sup> >Significant differences within the skeleton between healthy controls and patients with MS. Results are corrected for multiple comparisons across voxels. Coordinates are given in FMRIB58 FA standard space.

<sup>b</sup> Healthy controls > patients with MS,  $P \leq .001$ .

<sup>c</sup> Healthy controls < patients with MS,  $P \leq .001$ .
